# Supplementary material for: A novel endonuclease that may be responsible for damaged DNA base repair in Pyrococcus furiosus
Source: PubMed Central journal article supplement (PMC4357722; doi:10.1093/nar/gkv121), 2015-02-18
Supplement: supp_gkv121_nar-03740-d-2014-File004.pdf [file supp_gkv121_nar-03740-d-2014-File004.pdf]

Table S1 | DNA substrates

| Substrate name | (nt) | Nucleotide sequence                                                         |
|----------------|------|-----------------------------------------------------------------------------|
| 49N            | 49   | 5'-dAGCTACCATGCCTGCACGAATTAAGCAATTCGTAATCATGGTCATAGCT-3'                    |
| 49-I25         | 49   | 5'-dAGCTACCATGCCTGCACGAATTA <u>I</u> CAATTCGTAATCATGGTCATAGCT-3'            |
| 49-X25         | 49   | 5'-dAGCTACCATGCCTGCACGAATTA <u>X</u> CAATTCGTAATCATGGTCATAGCT-3'            |
| 49R            | 49   | 5'-dAGCTATGACCATGATTACGAATTGCTTAATTCGTGCAGGCATGGTAGCT-3'                    |
| 45N            | 45   | 5'-dCGAACTGCCTGGAATCCTGACGACATGTAGCGAACGATCACCTCA-3'                        |
| 45-I25         | 45   | 5'-dCGAACTGCCTGGAATCCTGACGAC <u>I</u> TGTAGCGAACGATCACCTCA-3'               |
| 45-U24         | 45   | 5'-dCGAACTGCCTGGAATCCTGACGA <u>U</u> ATGTAGCGAACGATCACCTCA-3'               |
| 45-AP25        | 45   | 5'-dCGAACTGCCTGGAATCCTGACGAC ( <b>AP</b> )TGTAGCGAACGATCACCTCA-3'           |
| 45-G25         | 45   | 5'-dCGAACTGCCTGGAATCCTGACGAC <u>G</u> TGTAGCGAACGATCACCTCA-3'               |
| 45R            | 45   | 5'-dTGAGGTGATCGTTCGCTACATGTCGTCAGGATTCCAGGCAGTTCG-3'                        |
| 49- dsDNA      |      | Prepared by annealing of 49 (N, -I25, X25) and complementary 49R            |
| 45- dsDNA      |      | Prepared by annealing of 45 (N, -I25, U24, AP25, G25) and complementary 45R |

Table S2| Identification of proteins by MS analysis.

| slice* | locus tag | annotation by NCBI                                 |
|--------|-----------|----------------------------------------------------|
| 1      | PF0053    | ATP dependent RNA helicase                         |
|        | PF1717    | translation initiation factor eIF-2, subunit gamma |
|        | PF1123    | hypothetical protein                               |
|        | PF1615    | hypothetical protein                               |
| 2      | PF0041    | oxidative cyclase                                  |
|        | PF1717    | translation initiation factor eIF-2, subunit gamma |
| 3      | PF1615    | hypothetical protein                               |
|        | PF0301    | cobyric acid synthase                              |
|        | PF1717    | translation initiation factor eIF-2, subunit gamma |
|        | PF1123    | hypothetical protein                               |
|        | PF1140    | translation initiation factor eIF-2, subunit alpha |
| 4      | PF1123    | hypothetical protein                               |
|        | PF1717    | translation initiation factor eIF-2, subunit gamma |
|        | PF1615    | hypothetical protein                               |
|        | PF1551    | hypothetical protein                               |
|        | PF0124    | hypothetical protein                               |
| 5      | PF1717    | translation initiation factor eIF-2, subunit gamma |
|        | PF1123    | hypothetical protein                               |
|        | PF1551    | hypothetical protein                               |
|        | PF0124    | hypothetical protein                               |
|        | PF0251    | hypothetical protein                               |
| 6      | PF0124    | hypothetical protein                               |
|        | PF1717    | translation initiation factor eIF-2, subunit gamma |
|        | PF1257    | nol1-nop2-sun family nucleolar protein             |
|        | PF1414    | annotated as flap endonuclease 1 (rad2)            |
| 7      | PF1140    | translation initiation factor eIF-2, subunit alpha |
|        | PF0875    | hypothetical protein                               |
|        | PF0258    | endonuclease IV                                    |
|        | PF0279    | ABC transporter                                    |
| 8      | PF1862    | DNA-binding protein                                |
|        | PF1385    | DNA polymerase, bacteriophage-type                 |
|        | PF0988    | hypothetical protein                               |
|        | PF1414    | flap structure-specific endonuclease               |
|        | PF1776    | hypothetical protein                               |

\* The proteins in fraction 48 of the MonoS column were separated by SDS-10 % PAGE and the gel slices were analyzed by MS. 16

Table S3 Conservation of the candidate genes for the repair of Uracil-containing DNA

| Organism                                   | EndoQ<br>arCOG04881 | Uracil-DNA glycosylase<br>arCOG00905 |           |           | Endonuclease IV<br>arCOG01894 | Exonuclease III<br>arCOG02207 |
|--------------------------------------------|---------------------|--------------------------------------|-----------|-----------|-------------------------------|-------------------------------|
| Euryarchaeota                              |                     |                                      |           |           |                               |                               |
| Thermococcales                             |                     |                                      |           |           |                               |                               |
| <i>Pyrococcus abyssi</i>                   | PAB0431             | PAB0474                              |           |           | PAB1103                       |                               |
| <i>Pyrococcus furiosus</i>                 | PF1551              | PF1385                               |           |           | PF0258                        |                               |
| <i>Pyrococcus horikoshii</i>               | PH1535              | PH1472                               |           |           | PH1905                        |                               |
| <i>Thermococcus gammatolerans</i>          | TGAM_0434           | TGAM_1814                            | TGAM_0543 |           | TGAM_1446                     | TGAM_0365                     |
| <i>Thermococcus kodakaraensis</i>          | TK0887              | TK2143                               |           |           | TK0170                        |                               |
| <i>Thermococcus onnurineus</i>             | TON_0421            | TON_1518                             | TON_0680  |           | TON_1961                      |                               |
| <i>Thermococcus sibiricus</i>              | TSIB_0578           | TSIB_0879                            | TSIB_1579 |           | TSIB_0912                     | TSIB_0948                     |
| Halobacteriales                            |                     |                                      |           |           |                               |                               |
| <i>Haloarcula marismortui</i>              |                     | rrnAC0123                            | rrnAC2636 | rrnAC2796 | rrnAC0005                     | rrnAC2015                     |
| <i>Halobacterium salinarum R1</i>          |                     | OE2052F                              | OE2758R   | OE3906F   |                               | OE1304F                       |
| <i>Halobacterium sp</i>                    |                     | VNG0707C                             | VNG1228C  | VNG2082G  |                               | VNG0183G                      |
| <i>Halomicrobium mukohataei DSM 12286</i>  |                     | Hmuk_0717                            | Hmuk_2639 | Hmuk_2571 |                               | Hmuk_0185                     |
| <i>Haloquadratum walsbyi</i>               |                     | HQ1380A                              | HQ2967A   |           |                               | HQ1417A                       |
| <i>Halorhabdus utahensis DSM 12940</i>     |                     | Huta_0183                            | Huta_1768 | Huta_2974 |                               | Huta_2402                     |
| <i>Halorubrum lacusprofundi ATCC 49239</i> |                     | Hlac_0379                            | Hlac_0610 | Hlac_1992 |                               | Hlac_0531                     |
| <i>Natronomonas pharaonis</i>              |                     | NP0084A                              | NP3952A   | NP5088A   |                               | NP5118A                       |
| Methanococcales                            |                     |                                      |           |           |                               |                               |
| <i>Methanocaldococcus fervens</i>          | Mefer_0424          |                                      |           |           | Mefer_1144                    | Mefer_1161                    |
| <i>Methanocaldococcus jannaschii</i>       | MJ0043              |                                      |           |           | MJ0133                        |                               |
| <i>Methanocaldococcus vulcanius M7</i>     | Metvu_0306          |                                      |           |           | Metvu_1373                    | Metvu_1445                    |
| <i>Methanococcus aeolicus</i>              | Maeo_1319           |                                      |           |           | Maeo_1039                     |                               |
| <i>Methanococcus maripaludis S2</i>        | MMP0095             |                                      |           |           | MMP1678                       | MMP1012                       |
| <i>Methanococcus maripaludis C5</i>        | MmarC5_1581         |                                      |           |           | MmarC5_1729                   | MmarC5_0582                   |
| <i>Methanococcus maripaludis C6</i>        | MmarC6_0852         |                                      |           |           | MmarC6_0994                   | MmarC6_1647                   |
| <i>Methanococcus maripaludis C7</i>        | MmarC7_1094         |                                      |           |           | MmarC7_0951                   | MmarC7_0254                   |
| <i>Methanococcus vanniellii SB</i>         | Mevan_1107          |                                      |           |           | Mevan_0978                    | Mevan_0339                    |
| Methanomicrobiales                         |                     |                                      |           |           |                               |                               |
| <i>Methanoregula boonei</i>                | Mboo_1948           |                                      |           |           | Mboo_0654                     | Mboo_0350 Mboo_2415           |
| <i>Methanosphaerula palustris E1 9c</i>    | Mpal_0960           |                                      |           |           | Mpal_1968                     |                               |
| <i>Methanocorpusculum labreanum Z</i>      | Mlab_1296           | Mlab_1146                            |           |           | Mlab_0226                     |                               |
| <i>Methanoculleus marisnigri JR1</i>       |                     | Memar_2334                           |           |           | Memar_0548                    | Memar_0638                    |
| <i>Methanospirillum hungatei</i>           | Mhun_1125           |                                      |           |           | Mhun_1782                     | Mhun_0441                     |
| Methanosarcinales                          |                     |                                      |           |           |                               |                               |
| <i>Methanococcoides burtonii</i>           | Mbur_1399           | Mbur_2338                            |           |           | Mbur_2015                     | Mbur_2145                     |
| <i>Methanosarcina acetivorans</i>          | MA0641              | MA3593                               | MA2265    |           | MA3548                        | MA2077                        |
| <i>Methanosarcina barkeri</i>              | Mbar_A1564          | Mbar_A1809                           |           |           | Mbar_A2341                    | Mbar_A3242                    |
| <i>Methanosarcina mazei</i>                | MM_1805             | MM_0486                              |           |           | MM_0460                       | MM_3148                       |
| <i>Methanosaeta thermophila</i>            | Mthe_0764           | Mthe_1479                            |           |           | Mthe_0406                     |                               |

|                                                |          |             |             |         |  |             |         |          |             |
|------------------------------------------------|----------|-------------|-------------|---------|--|-------------|---------|----------|-------------|
| Thermoplasmatales                              |          |             |             |         |  |             |         |          |             |
| <i>Picrophilus torridus</i>                    |          | PTO0989     | PTO0919     | PTO1020 |  | PTO0616     |         |          | PTO0627     |
| <i>Thermoplasma acidophilum</i>                |          | Ta0477      |             |         |  | Ta0096      | Ta0891  |          | Ta1506m     |
| <i>Thermoplasma volcanium</i>                  |          | TVN0827     |             |         |  | TVN0157     | TVN0971 |          | TVN0046     |
| Methanobacteriales                             |          |             |             |         |  |             |         |          |             |
| <i>Methanothermobacter thermoautotrophicus</i> | MTH1305  |             |             |         |  | MTH1010     |         |          | MTH212      |
| <i>Methanosphaera stadtmanae</i>               | Msp_1523 |             |             |         |  | Msp_0992    |         |          |             |
| <i>Methanobrevibacter smithii</i>              |          |             |             |         |  | Msm_0963    |         |          | Msm_1479    |
| Methanopyrales                                 |          |             |             |         |  |             |         |          |             |
| <i>Methanopyrus kandleri</i>                   | MK0424   |             |             |         |  |             |         |          |             |
| Archaeoglobales                                |          |             |             |         |  |             |         |          |             |
| <i>Archaeoglobus fulgidus</i>                  |          | AF2277      |             |         |  |             |         |          | AF0580      |
| environmental samples                          |          |             |             |         |  |             |         |          |             |
| <i>Uncultured methanogenic archaeon RC-I</i>   |          | RRC526      |             |         |  | RRC305      |         | RCIX1223 | RCIX2491    |
| RCIX2501                                       |          |             |             |         |  |             |         |          |             |
| Crenarchaeota                                  |          |             |             |         |  |             |         |          |             |
| Sulfolobales                                   |          |             |             |         |  |             |         |          |             |
| <i>Sulfolobus acidocaldarius</i>               |          | Saci_0159   | Saci_1756   |         |  | Saci_0015   |         |          | Saci_0129   |
| <i>Sulfolobus islandicus</i> L S 2 15          |          | LS215_0085  | LS215_2750  |         |  | LS215_2937  |         |          | LS215_0101  |
| <i>Sulfolobus islandicus</i> M 14 25           |          | M1425_0085  | M1425_2591  |         |  | M1425_2772  |         |          | M1425_0101  |
| <i>Sulfolobus islandicus</i> M 16 27           |          | M1627_0085  | M1627_2644  |         |  | M1627_2824  |         |          | M1627_0101  |
| <i>Sulfolobus islandicus</i> M 16 4            |          | M164_0085   | M164_2575   |         |  | M164_2753   |         |          | M164_0101   |
| <i>Sulfolobus islandicus</i> Y G 57 14         |          | YG5714_0087 | YG5714_2757 |         |  | YG5714_2952 |         |          | YG5714_0103 |
| <i>Sulfolobus islandicus</i> Y N 15 51         |          | YN1551_0085 | YN1551_0133 |         |  | YN1551_3142 |         |          | YN1551_0101 |
| <i>Sulfolobus solfataricus</i>                 |          | SSO2275     | SSO2733     |         |  | SSO2156     |         |          | SSO2290     |
| <i>Sulfolobus tokodaii</i>                     |          | ST2238      | ST2405      |         |  | ST2148      |         |          | ST1910      |
| <i>Metallosphaera sedula</i>                   |          | Msed_0720   | Msed_2071   |         |  | Msed_0729   |         |          | Msed_1434   |
| Thermoproteales                                |          |             |             |         |  |             |         |          |             |
| <i>Thermoproteus neutrophilus</i> V24Sta       |          | Tneu_1169   | Tneu_1948   |         |  | Tneu_1593   |         |          |             |
| <i>Caldivirga maquilingensis</i>               |          | Cmaq_1649   | Cmaq_0814   |         |  | Cmaq_0997   |         |          | Cmaq_1739   |
| <i>Pyrobaculum aerophilum</i>                  |          | PAE0651     | PAE1327     |         |  | PAE3257     |         |          |             |
| <i>Pyrobaculum arsenaticum</i>                 |          | Pars_2305   |             |         |  | Pars_1689   |         |          |             |
| <i>Pyrobaculum calidifontis</i>                |          | Pcal_2076   |             |         |  | Pcal_1781   |         |          |             |
| <i>Pyrobaculum islandicum</i>                  |          | Pisl_0718   | Pisl_1921   |         |  | Pisl_0510   |         |          |             |
| <i>Thermofilum pendens</i>                     |          | Tpen_0798   |             |         |  | Tpen_0883   |         |          |             |
| Desulfurococcales                              |          |             |             |         |  |             |         |          |             |
| <i>Staphylothermus marinus</i> F1              |          | Smar_1316   |             |         |  | Smar_1185   |         |          |             |
| <i>Desulfurococcus kamchatkensis</i>           |          | DKAM_0281   |             |         |  | DKAM_0986   |         |          |             |
| <i>Ignicoccus hospitalis</i>                   |          | Igni_0301   |             |         |  | Igni_1092   |         |          |             |
| <i>Aeropyrum pernix</i>                        |          | APE_0427.1  |             |         |  | APE_2104.1  |         |          |             |
| <i>Hyperthermus butylicus</i>                  |          | Hbut_0091   |             |         |  | Hbut_1039   |         |          |             |
| Cenarchaeales                                  |          |             |             |         |  |             |         |          |             |
| <i>Cenarchaeum symbiosum</i> A                 |          | CENSYa_0591 | CENSYa_1913 |         |  | CENSYa_1925 |         |          |             |
| Korarchaeota                                   |          |             |             |         |  |             |         |          |             |
| <i>Korarchaeum cryptofilum</i> OPF8            |          | Kcr_0977    |             |         |  | Kcr_0075    |         |          |             |

|                                      |            |           |            |
|--------------------------------------|------------|-----------|------------|
| Thaumarchaeota                       |            |           |            |
| <i>Nitrosopumilus maritimus</i> SCM1 | Nmar_0366  | Nmar_1056 | Nmar_0064  |
| Aigarchaeota                         |            |           |            |
| <i>Caldiarchaeum subterraneum</i>    | CSUB_C1151 |           | CSUB_C1167 |
| Nanoarchaeota                        |            |           |            |
| <i>Nanoarchaeum equitans</i>         | NEQ372     |           |            |

---

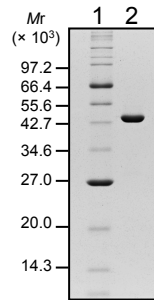

**Figure S1. Preparation of recombinant PF1551.** The protein marker (lane 1) and the purified PF1551 (1  $\mu$ g) (lane 2) was subjected to SDS-12% PAGE followed by CBB staining. The sizes of markers are shown on the left of the panel.

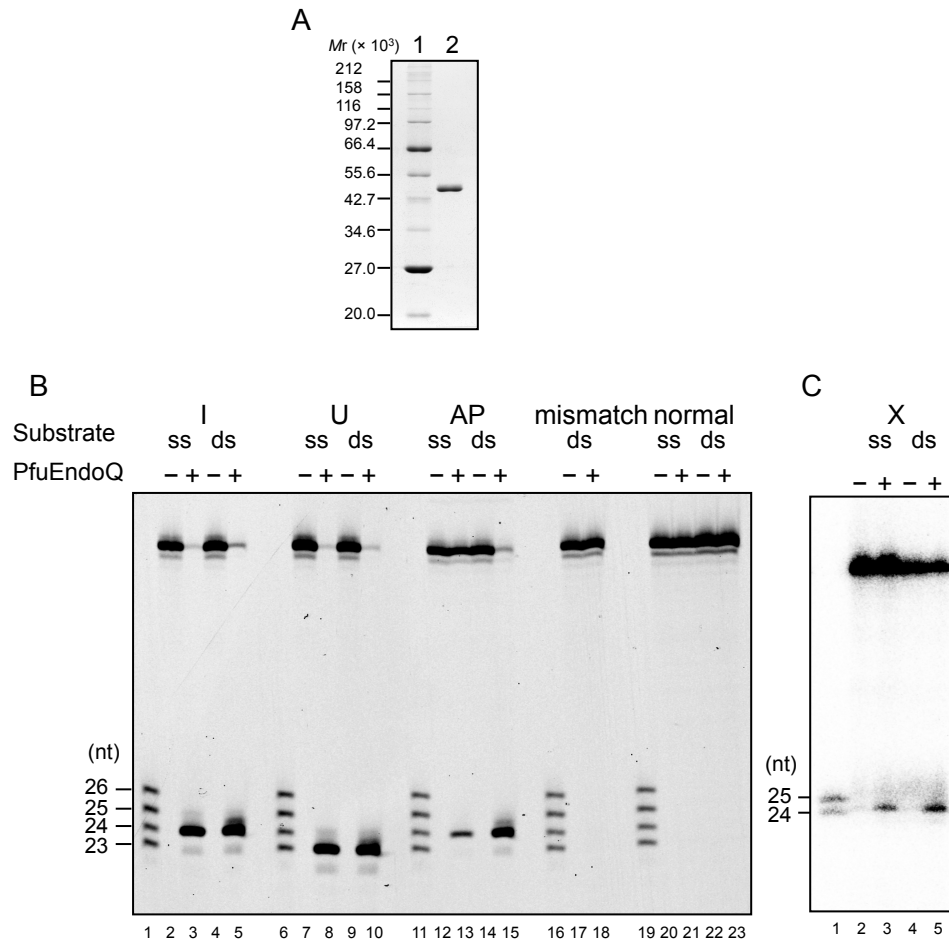

**Figure S2. Properties of the recombinant TK0887 protein.** (A) The protein markers (lane 1) and the purified TK0887 protein (1  $\mu$ g) (lane 2) were subjected to SDS-12% PAGE followed by CBB staining. The marker sizes are shown on the left of the panel. (B) Substrate specificity of TkoEndoQ. 5'-Cy5-labeled ssDNA (ss) or dsDNA (ds) substrates containing dI (lanes 2-5), dU (lanes 7-10), AP (lanes 12-15), and a mismatch (lanes 17 and 18) were subjected to the reactions with TkoEndoQ. The normal DNA (lanes 20-23) was used as the controls. The mixture of 5'-Cy5-labeled ssDNA (23, 24, 25, and 26 nt) was loaded on lanes 1, 6, 11, 16, and 19. The marker sizes are shown on the left of the panel. (C) 5'-32P-labeled ssDNA (ss) or dsDNA (ds) substrates containing dX (lanes 2-5) were subjected to the reactions with TkoEndoQ. The mixture of 5'-32P-labeled ssDNA (24 and 25 nt) was loaded in lane 1. The marker sizes are shown on the left of the panel.

|        |              | motif I |   |   |   |   |   |   |   |   |   | motif II |   |   |   |   |     |   |   |   |   | protein group |   |   |   |   |   |   |   |   |   |   |   |   |   |   |   |   |   |   |   |   |   |   |   |   |   |   |   |   |   |   |   |   |   |   |   |   |    |
|--------|--------------|---------|---|---|---|---|---|---|---|---|---|----------|---|---|---|---|-----|---|---|---|---|---------------|---|---|---|---|---|---|---|---|---|---|---|---|---|---|---|---|---|---|---|---|---|---|---|---|---|---|---|---|---|---|---|---|---|---|---|---|----|
| Pfu    | EndoQ        | 1       | M | I | V | D | G | D | L | H | I | H        | S | H | S | Y | S   | - | - | K | A | V             | S | K | L | M | T | F | P | I | A | E | N | A | K | L | K | G | L | N | - | - | L | V | G | T | G | D | S | L | N | P | H | W | E | K | E | L | 1) |
| Tko    | EndoQ        | 1       | M | I | V | D | A | D | L | H | I | H        | S | R | Y | S | -   | - | K | A | V | S             | K | A | M | T | I | P | N | L | A | E | N | A | R | F | K | G | L | E | - | - | M | V | G | T | G | D | I | L | N | P | N | W | E | K | E | L |    |
| Mac    | EndoQ        | 1       | M | K | V | N | A | D | L | H | L | H        | S | K | Y | S | -   | - | M | A | C | S             | G | K | M | E | L | P | T | I | A | S | E | A | S | K | K | G | M | E | - | - | L | I | G | T | G | D | C | T | H | P | E | W | L | K | D | I |    |
| Mth    | EndoQ        | 1       | M | I | I | N | A | D | L | H | I | H        | S | C | F | S | -   | - | R | A | T | S             | R | N | M | V | I | D | N | I | A | P | Q | A | R | L | K | G | L | Q | - | - | L | V | G | T | G | D | A | L | H | P | G | W | R | K | I | I |    |
| Mma    | EndoQ        | 1       | M | I | I | N | A | D | L | H | I | H        | S | K | Y | S | -   | - | M | G | T | S             | K | Y | M | D | I | E | H | I | L | K | Y | G | P | V | K | G | L | D | - | - | L | I | A | T | G | D | C | L | H | A | K | W | L | E | E | I |    |
| Mka    | EndoQ        | 3       | E | Q | Y | D | S | D | L | H | L | H        | S | Q | Y | S | -   | - | G | G | T | S             | P | R | M | V | I | R | E | I | A | R | G | A | A | K | K | G | L | D | - | - | L | V | G | T | G | D | I | L | H | P | K | W | R | R | H | V |    |
| Dedulf | EndoQ        | 2       | E | R | F | R | A | D | L | H | I | H        | S | R | Y | S | -   | - | R | A | T | S             | K | A | L | T | P | R | H | L | S | A | W | A | L | A | K | G | L | E | - | - | V | I | G | T | G | D | F | T | H | P | K | W | L | E | E | I |    |
| Bsu    | EndoQ        | 2       | K | K | I | Y | A | D | L | H | I | H        | I | G | R | T | (7) | T | G | A | K | T             | L | T | L | D | R | I | L | V | E | A | S | E | H | K | G | I | E | - | - | L | F | G | I | D | C | H | S | P | E | V | I | L | E | L |   |   |    |
| Afu    | PHP          | 1       | - | M | L | R | A | E | L | H | V | H        | S | S | F | S | -   | - | D | G | R | D             | - | - | G | V | R | K | I | L | E | A | A | V | E | K | K | L | E | - | - | V | I | A | I | T | D | - | - | H | D | T | V | Q | G | S | L |   |    |
| Halo.v | PHP          | 12      | R | T | L | A | V | D | L | H | V | H        | T | D | A | S | -   | - | D | C | E | M             | - | - | S | V | E | A | V | L | A | R | A | A | A | V | G | L | D | - | - | A | V | A | I | T | D | - | - | H | D | S | V | G | A | L | P |   |    |
| Sso    | PHP          | 1       | - | - | M | F | F | D | L | H | V | H        | S | R | Y | S | -   | - | D | G | K | Y             | - | - | L | P | K | D | I | I | A | Y | A | K | A | K | H | I | H | - | - | V | A | I | T | D | - | - | H | D | T | S | L | G | L | N |   |   |    |
| Ape    | PHP          | 1       | - | - | M | L | V | E | L | H | S | H        | T | T | V | S | -   | - | D | G | F | Q             | - | - | T | P | M | E | I | V | K | I | A | A | K | A | G | L | A | - | - | A | I | A | V | T | D | - | - | H | D | T | F | R | G | S | S |   |    |
| Tth    | PolX-C       | 335     | P | Q | V | K | G | D | L | Q | V | H        | S | T | Y | S | -   | - | D | G | Q | N             | - | - | T | L | E | E | L | W | E | A | A | K | T | M | G | Y | R | - | - | Y | L | A | V | T | D | - | - | H | S | P | A | V | R | V | A |   |    |
| Bsu    | PolX-C       | 362     | G | D | I | K | G | D | L | H | M | H        | S | T | W | S | -   | - | D | G | A | F             | - | - | S | I | R | E | M | A | E | A | C | I | K | K | G | Y | Q | - | - | Y | M | A | I | T | D | - | - | H | S | Q | Y | L | K | V | A |   |    |
| Mth    | PolX-C       | 362     | L | D | I | R | G | D | L | H | M | H        | S | L | F | S | -   | - | D | G | I | D             | - | - | S | M | E | Q | M | A | E | Y | A | S | V | L | G | R | E | - | - | Y | I | A | I | T | D | - | - | H | A | R | Y | I | D | D | P |   |    |
| Eco    | PolIII-alpha | 3       | E | P | R | F | V | H | L | R | V | H        | S | D | Y | S | M   | I | D | G | L | A             | - | - | K | T | A | P | L | V | K | A | A | A | L | G | M | P | - | - | A | L | A | I | T | D | - | - | F | T | N | L | C | G | L | V |   |   |    |
| Tth    | PolIII-alpha | 4       | K | L | R | F | A | H | L | H | Q | H        | T | Q | F | S | L   | L | D | G | A | A             | - | - | K | L | S | D | L | L | K | W | V | K | E | T | T | P | E | D | P | A | L | A | M | T | D | - | - | H | G | N | L | F | G | A | I |   |    |
| Bsu    | PolIII-alpha | 1       | - | M | S | F | V | H | L | Q | V | H        | S | G | Y | S | L   | L | N | S | A | A             | - | - | A | V | E | E | L | V | S | E | A | D | R | L | G | Y | A | - | - | S | L | A | L | T | D | - | - | D | H | V | M | Y | G | A | I |   |    |
| Bsu    | HPP          | 1       | M | Q | - | K | R | D | G | H | I | H        | T | P | F | C | P   | - | - | H | G | S             | N | D | - | - | T | L | R | Q | Y | A | E | E | A | L | K | K | G | F | E | - | - | S | I | T | F | T | E | - | - | H | A | P | L | P | P | S | F  |
| Dra    | HPP          | 1       | M | T | G | L | C | D | S | H | L | H        | T | P | L | C | G   | - | - | H | A | T             | G | - | - | T | P | R | E | Y | A | Q | A | A | L | D | A | G | L | S | - | - | G | L | C | F | T | D | - | - | H | M | P | M | P | R | W | Y |    |
| Tth    | HPP          | 1       | - | - | M | V | D | S | H | V | H | T        | P | L | C | G | -   | - | H | A | E | G             | - | - | H | P | E | A | Y | L | E | E | A | R | A | K | L | K | - | - | G | V | V | F | T | D | - | - | H | S | P | M | P | P | W | Y |   |   |    |

  

|     |              | motif III |   |   |   |   |   |   |   |   |      | motif IV |   |   |   |   |   |   |   |      |      |   |   |   |   |   |   |      |      |      |   |   |   |      |      |      |   |   |   |   |   |   |   |   |   |   |   |   |   |   |   |
|-----|--------------|-----------|---|---|---|---|---|---|---|---|------|----------|---|---|---|---|---|---|---|------|------|---|---|---|---|---|---|------|------|------|---|---|---|------|------|------|---|---|---|---|---|---|---|---|---|---|---|---|---|---|---|
| Pfu | EndoQ        | 72        | I | L | T | C | E | V | E | D | -    | -        | K | R | R | V | H | L | L | I    | (45) | L | I | G | P | A | H | A    | F    | (23) | F | L | E | L    | G    | (15) | S | I | P | Y | L | S | N | S | D | A | H | S | P | N | P |
| Tko | EndoQ        | 72        | L | L | T | T | E | V | E | D | -    | -        | T | R | R | V | H | V | L | I    | (45) | L | I | G | P | A | H | A    | F    | (23) | F | L | E | L    | G    | (15) | K | L | T | Y | L | S | N | S | D | A | H | S | P | M | P |
| Mac | EndoQ        | 70        | I | P | T | T | E | I | E | D | -    | -        | S | N | R | V | H | L | L | I    | (44) | L | I | G | P | C | H | A    | F    | (25) | F | I | E | L    | G    | (15) | R | L | T | F | L | T | N | S | D | A | H | S | P | Y | T |
| Mth | EndoQ        | 72        | V | I | T | A | E | V | E | D | -    | -        | S | R | R | V | H | L | L | I    | (42) | M | A | G | P | S | H | A    | F    | (22) | F | L | E | L    | G    | (15) | D | I | P | F | L | T | N | S | D | A | H | S | P | W | P |
| Mma | EndoQ        | 61        | L | L | S | T | E | V | E | D | -    | -        | R | N | R | V | H | L | I | Y    | (45) | L | I | G | P | A | H | A    | F    | (22) | F | I | E | L    | G    | (15) | E | L | P | F | L | T | N | S | D | A | H | S | F | Y | S |
| Mka | EndoQ        | 76        | V | P | T | V | E | V | E | D | -    | -        | E | R | R | V | H | L | I | I    | (45) | L | F | G | P | A | H | A    | F    | (25) | F | V | E | L    | G    | (15) | E | Y | T | F | L | T | C | S | D | A | H | S | P | Y | P |
| Dsu | EndoQ        | 92        | V | L | Q | A | E | I | S | S | (7)  | V        | R | K | V | H | L | V | F | (46) | F    | L | V | P | A | H | I | W    | (28) | A    | L | E | T | G    | (15) | R    | F | R | L | I | S | N | S | D | A | H | S | G | E | K |   |
| Bsu | EndoQ        | 86        | L | L | G | S | E | L | E | I | (5)  | S        | G | P | I | H | V | L | V | F    | (44) | L | F | I | P | A | H | I    | F    | (25) | A | V | E | L    | G    | (15) | Y | P | F | L | T | N | S | D | A | H | S | L | G | K |   |
| Afu | PHP          | 62        | L | P | G | C | E | V | T | A | -    | -        | S | T | G | H | V | L | V | Y    | (24) | V | C | F | L | A | H | P    | F    | (17) | G | I | E | T    | F    | (17) | S | K | P | E | I | A | G | S | D | A | H | S | A | R | A |
| Hvo | PHP          | 73        | V | P | G | V | E | V | S | T | -    | -        | A | D | G | H | L | L | A | L    | (24) | L | A | V | V | P | H | P    | F    | (16) | A | I | E | A    | Y    | (20) | G | L | P | G | T | G | S | D | A | H | R | P | A | L |   |
| Sso | PHP          | 52        | I | P | Q | V | E | V | T | - | -    | E        | Y | G | H | V | V | I | L | (23) | V    | V | F | S | H | P | F | (17) | L    | I    | E | I | Y | (19) | N    | L    | P | G | V | S | N | S | D | A | H | V | I | Q | A |   |   |
| Ape | PHP          | 60        | I | P | A | A | E | V | R | S | -    | -        | E | W | G | D | V | V | V | L    | (25) | V | T | I | A | A | H | P    | G    | (20) | A | I | E | V    | W    | (19) | N | H | T | P | V | S | G | S | D | A | H | V | P | S | M |
| Tth | PolX-C       | 413       | L | A | G | A | E | V | D | I | (19) | L        | V | S | V | H | S | R | F | N    | (18) | V | H | V | L | A | H | P    | T    | (26) | A | V | E | I    | D    | (19) | G | L | W | I | S | L | T | S | D | A | H | Q | T | D | H |
| Bsu | PolX-C       | 467       | L | K | G | V | E | M | D | I | (19) | I        | A | S | I | H | S | S | F | N    | (18) | V | D | I | A | H | P | T    | (26) | A    | L | E | L | N    | (19) | G    | V | T | L | V | I | N | T | D | A | H | N | I | E | M |   |
| Mth | PolX-C       | 455       | L | A | G | V | E | V | S | I | (19) | I        | A | S | I | H | D | P | G | N    | (13) | V | S | I | G | H | P | T    | (25) | A    | L | E | V | N    | (19) | G    | C | K | I | A | I | N | S | D | A | H | S | R | G | A |   |
| Eco | PolIII-alpha | 65        | I | V | G | A | D | F | N | V | (6)  | D        | E | L | T | H | L | T | L | (41) | I    | L | L | S | G | G | R | M    | (30) | F    | L | E | L | I    | (21) | G    | L | P | V | V | A | T | N | D | V | R | F | I | D | S |   |
| Tth | PolIII-alpha | 68        | I | L | G | Y | E | A | Y | V | (15) | G        | G | Y | F | H | L | T | L | (40) | I    | A | L | S | G | L | G | M    | (30) | F    | I | E | I | Q    | (21) | G    | L | G | M | V | A | T | N | D | V | H | Y | V | R | K |   |
| Bsu | PolIII-alpha | 62        | I | I | G | L | T | A | S | V | (6)  | L        | E | A | P | L | V | L | L | (37) | I    | A | I | T | P | G | E | K    | (30) | A    | F | Y | F | S    | (21) | G    | I | P | V | T | A | T | D | G | V | H | Y | I | R | K |   |
| Bsu | HPP          | 85        | R | T | G | L | E | V | D | Y | (22) | I        | L | S | V | H | F | L | R | T    | (47) | P | K | R | V | G | H | I    | T    | (33) | E | L | D | F    | N    | (25) | K | I | P | L | V | F | G | S | D | A | H | Q | A | G | D |
| Dra | HPP          | 80        |   |   |   |   |   |   |   |   |      |          |   |   |   |   |   |   |   |      |      |   |   |   |   |   |   |      |      |      |   |   |   |      |      |      |   |   |   |   |   |   |   |   |   |   |   |   |   |   |   |



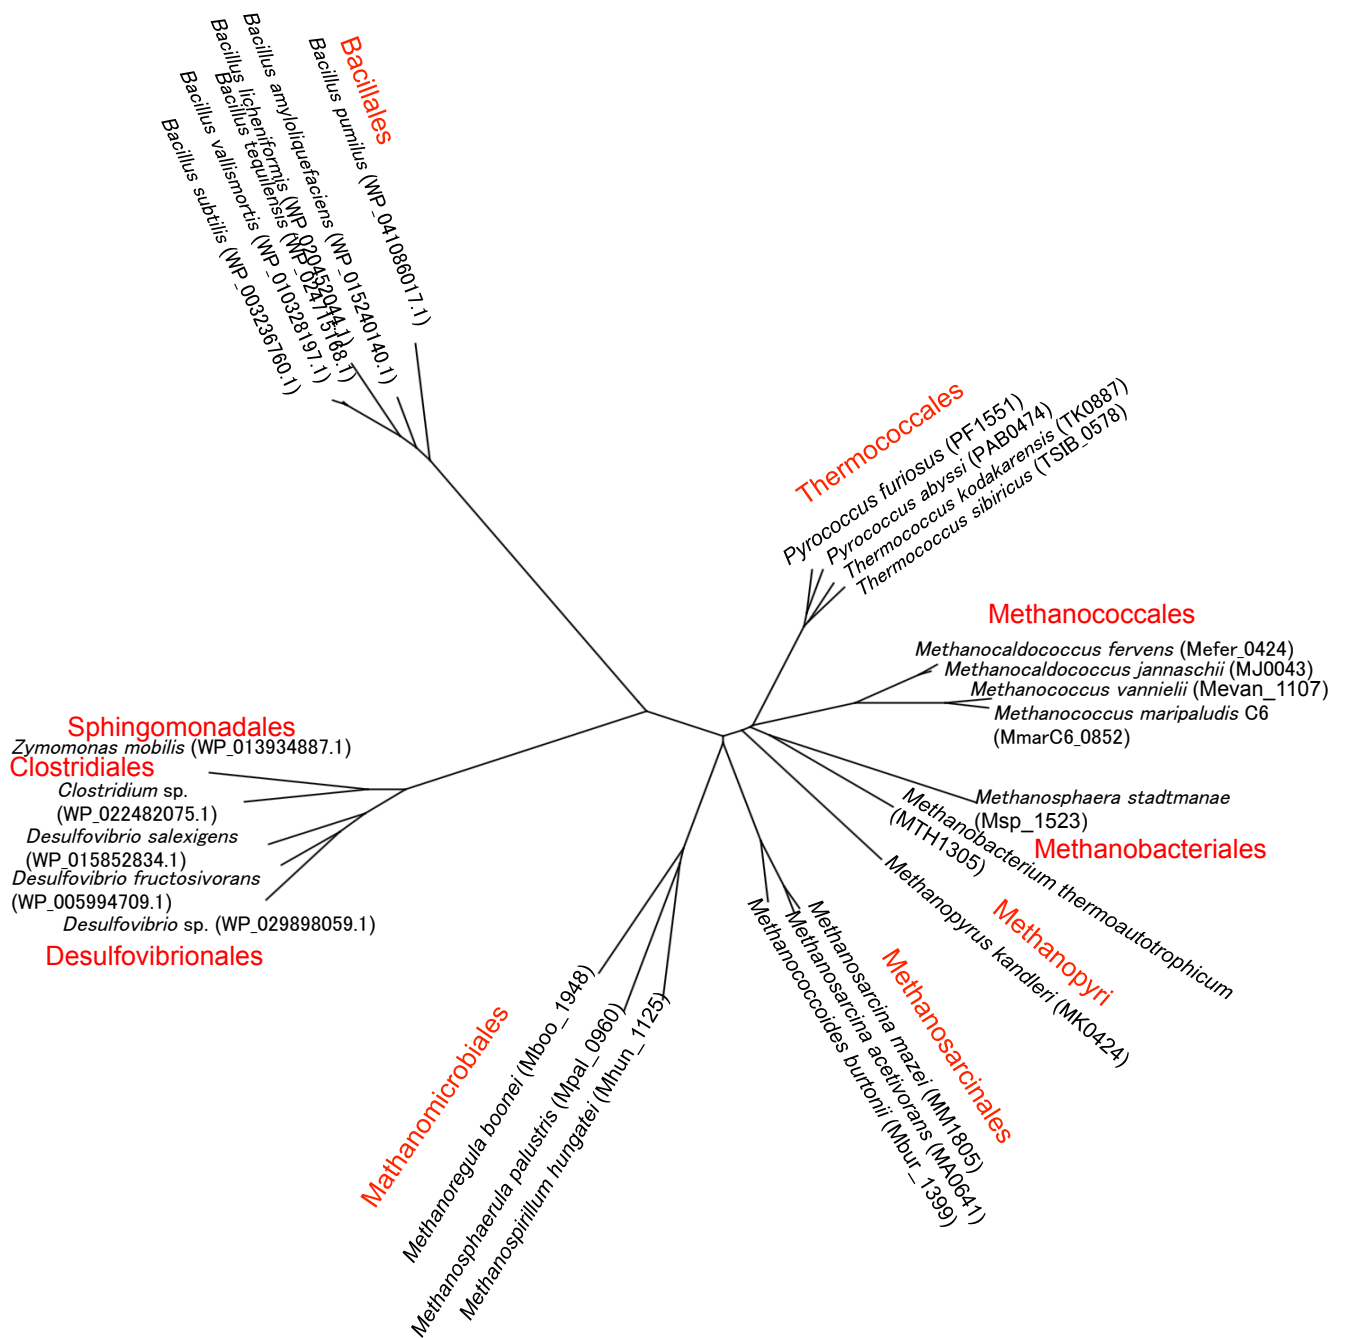

**Figure S4. An unrooted phylogenetic tree of EndoQ homologs.** Construction of a phylogenetic tree based on the neighbor-joining method was performed by using MAFFT (<http://mafft.cbrc.jp/alignment/server/phylogeny.html>). The names of organisms and accession numbers of proteins (in parentheses) are shown along the branch.

**A**

49N 5'-AGCTACCATGCCTGCACGAATTAAGCAATTCGTAATCATGGTCATAGCT-3'

49N-I25 5'-AGCTACCATGCCTGCACGAATTA<sup>25</sup>ICAATTCGTAATCATGGTCATAGCT-3'

49N-CPD 5'-AGCTACCATGCCTGCACGAAT<sup>21</sup>TTAAGCAATTCGTAATCATGGTCATAGCT-3'  
CPD

49N-6-4PPs 5'-AGCTACCATGCCTGCACGAAT<sup>21</sup>TTAAGCAATTCGTAATCATGGTCATAGCT-3'  
6-4

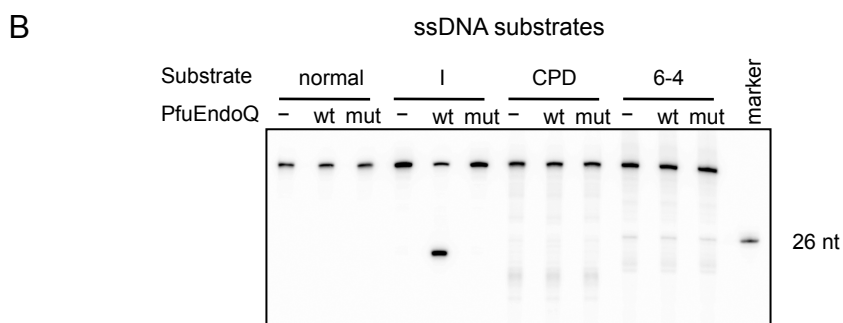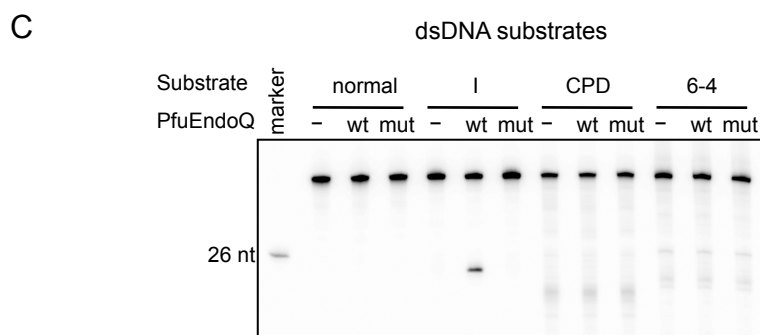

**Figure S5. Nuclease activity of PfuEndoQ against UV-damaged DNA.** (A) The nucleotide sequences of the substrates containing cyclobutane pyrimidine dimer (CPD), pyrimidine (6-4) pyrimidone photoproducts (6-4 PPs), and dl. (B, C) Nuclease activity of PfuEndoQ (wt) or its inactivated mutant, PfuEndoQ D193A (mut), on ssDNA substrate (B) and dsDNA substrates (C). The reaction mixtures containing 10 nM PfuEndoQ and 10 nM <sup>32</sup>P-labeled substrate were incubated in the solution with 50 mM TrisHCl, pH 8.0, 50 mM NaCl, 1 mM MgCl<sub>2</sub>, and 0.1% Tween 20 at 75°C for 10 min (ssDNA) and at 65°C for 60 min (dsDNA). The reaction mixtures were analyzed by 8M Urea-15% PAGE followed by autoradiography using Typhoon Trio+ Imager (GE Healthcare).

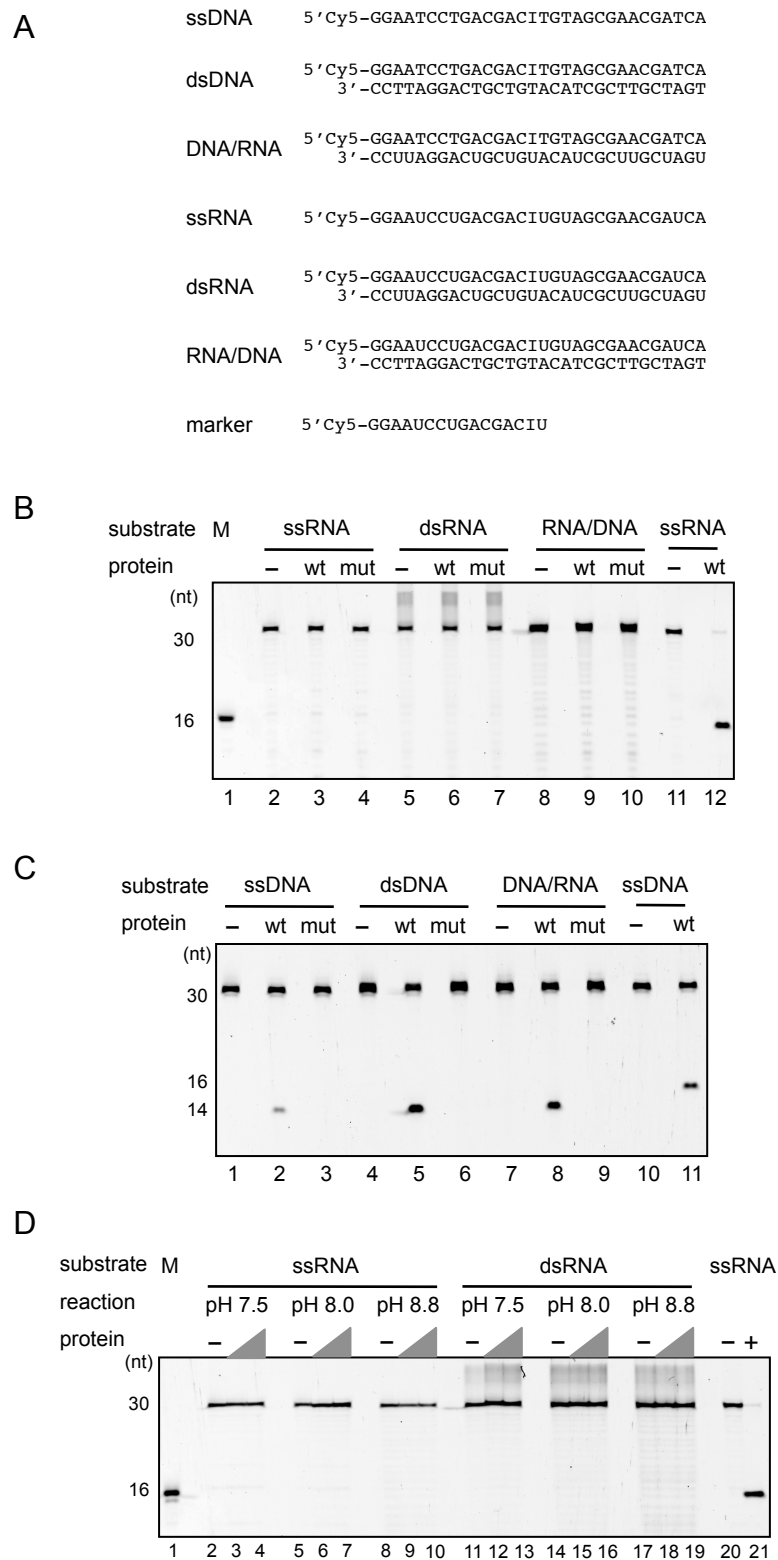

**Figure S6. Nuclease activity of PfuEndoQ against RNA.** (A) The nucleotide sequences of the substrates. (B, C, and D). Various substrates containing inosine were incubated with PfuEndoQ (wt) or its mutant PfuEndoQ D193A (mut). The reaction mixtures containing 10 nM PfuEndoQ and 10 nM Cy5-labeled substrate were incubated in the solution with 50 mM TrisHCl, pH 8.0, 50 mM NaCl, 1 mM MgCl<sub>2</sub>, and 0.1% Tween 20 at 75°C for 10 min. The reaction mixtures were analyzed by 8 M urea, 15% PAGE, and the Cy5-labeled oligonucleotide was visualized by Typhoon Trio+ Imager (GE Healthcare). (B) Cy5-labeled RNA substrates were used. Lane 1, product marker (16 nt); lanes 2-10 PfuEndoQ; lane 12, PfuEndoV (positive control). (C) Cy5-labeled DNA substrates were used. Lanes 1-9, PfuEndoQ; lane 11, PfuEndoV (positive control). (D) Cy5-labeled RNA substrates were incubated with PfuEndoQ (10 nM or 50 nM) in the solutions of various pH. Lane 1, marker (16 nt); lanes 2-10, ssRNA incubated with PfuEndoQ; lanes 11-19, dsRNA incubated with PfuEndoQ; lane 21 Pfu EndoV was used as a positive control.
